# Supplementary material
Source: HighWire-hosted journal article supplement (https://www.jneurosci.org/content/39/31/6162)
Supplement: inline-supplementary-material-1 [file inline-supplementary-material-1.docx]

**Itthpuripat, Sprague, & Serences – EXTENDED DATA**


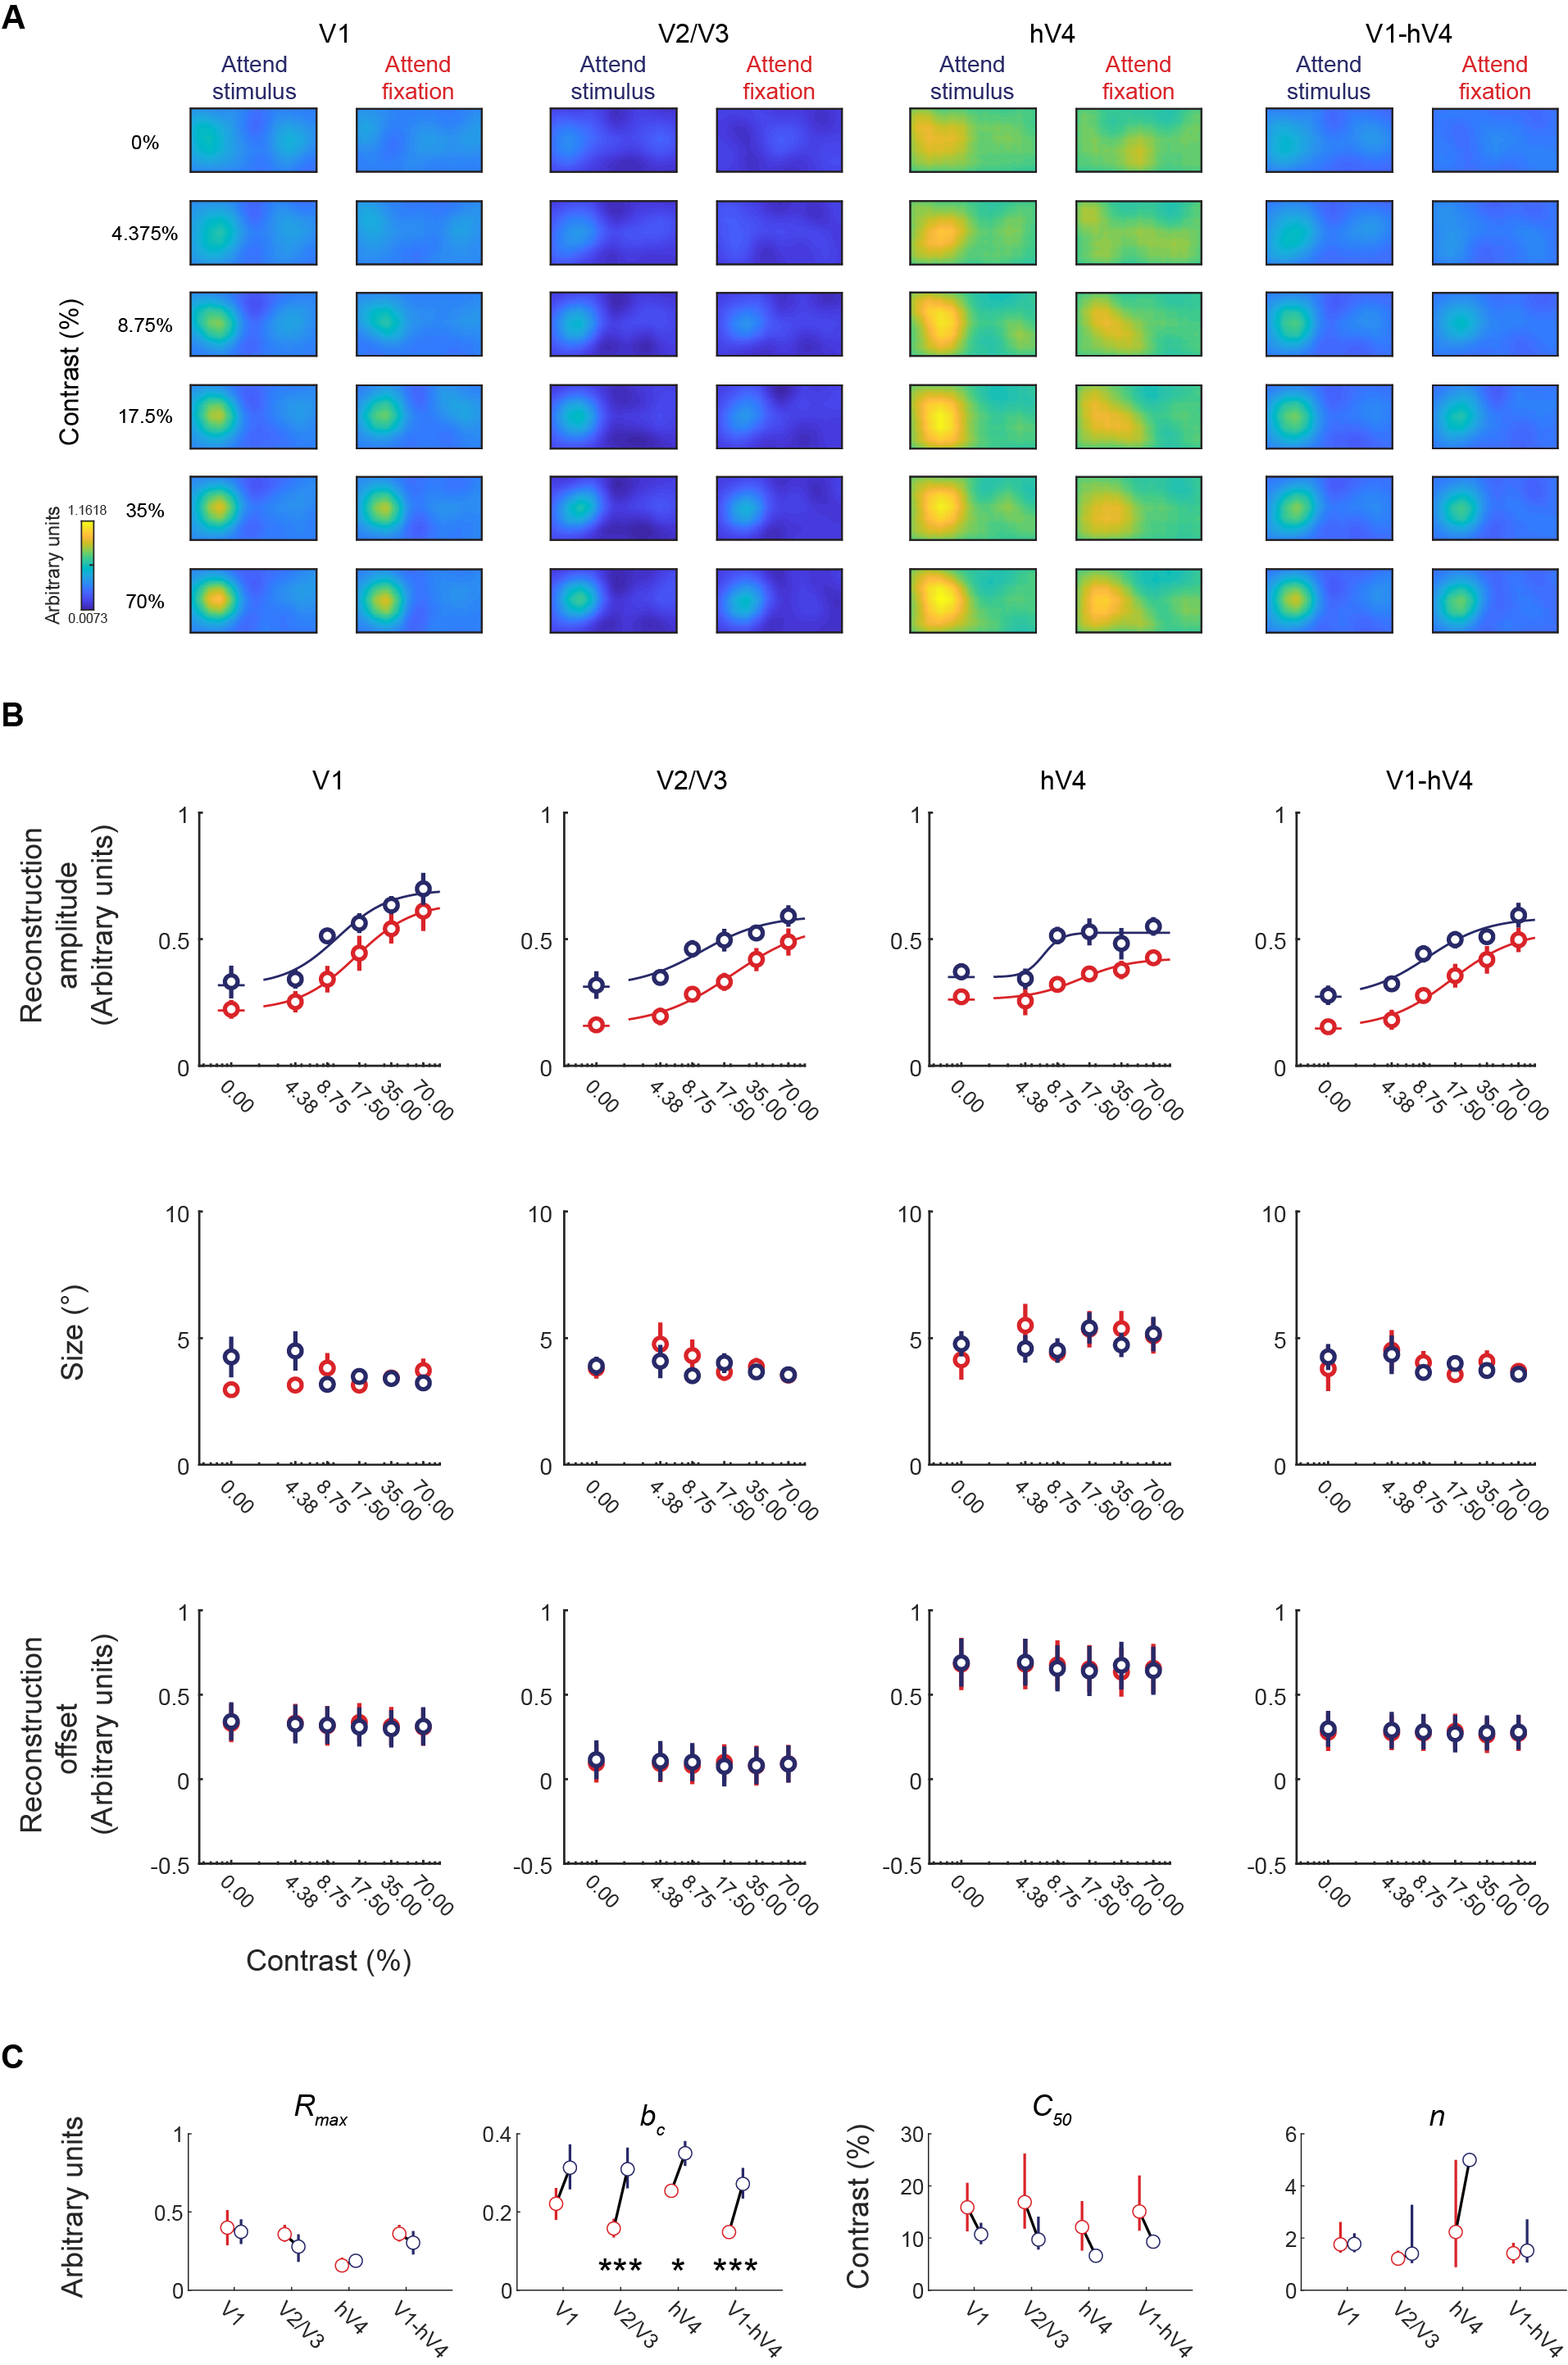


**Extended Data Figure 1 (caption on next page)**

**Extended Data Figure 1** Multivariate fMRI results across visual areas V1, V2/3, hV4, and V1-hV4 computed using high-contrast mapping stimuli. Data presented as in Figure 4, but computed using high-contrast mapping stimuli. **(A)** The spatial reconstructions of visual stimuli across different contrast and attention conditions. **(B)** The plots of the amplitude, size, and reconstruction offset parameters of the spatial reconstructions shown in **(A)** as a function of stimulus contrast across different attention conditions. **(C)** Corresponding Naka-Rushton fit parameters of the CRFs based on the amplitude (*A*) of surfaces fit to spatial reconstructions, shown in the top panels of **(B)**. * and *** indicated significant differences between attention conditions (red = attend-fixation and blue = attend-stimulus) with *p*’s < 0.05 and p’s < 0.001, respectively. Error bars represent 68% CIs from resampling procedures. Results are overall consistent with those presented in Figure 4, except no significant different was found for *Rmax* in any ROI, no significant difference in *bc* was found for V1, and a significant difference in *bc* was found in hV4.
